# Supplementary material
Source: publisher figshare collection journal article supplement (https://frontiersin.figshare.com/ndownloader/files/27552884)
Supplement: Supplementary file [file 27552884]

## Supplementary Figures 1-6

### Supplementary Table 1

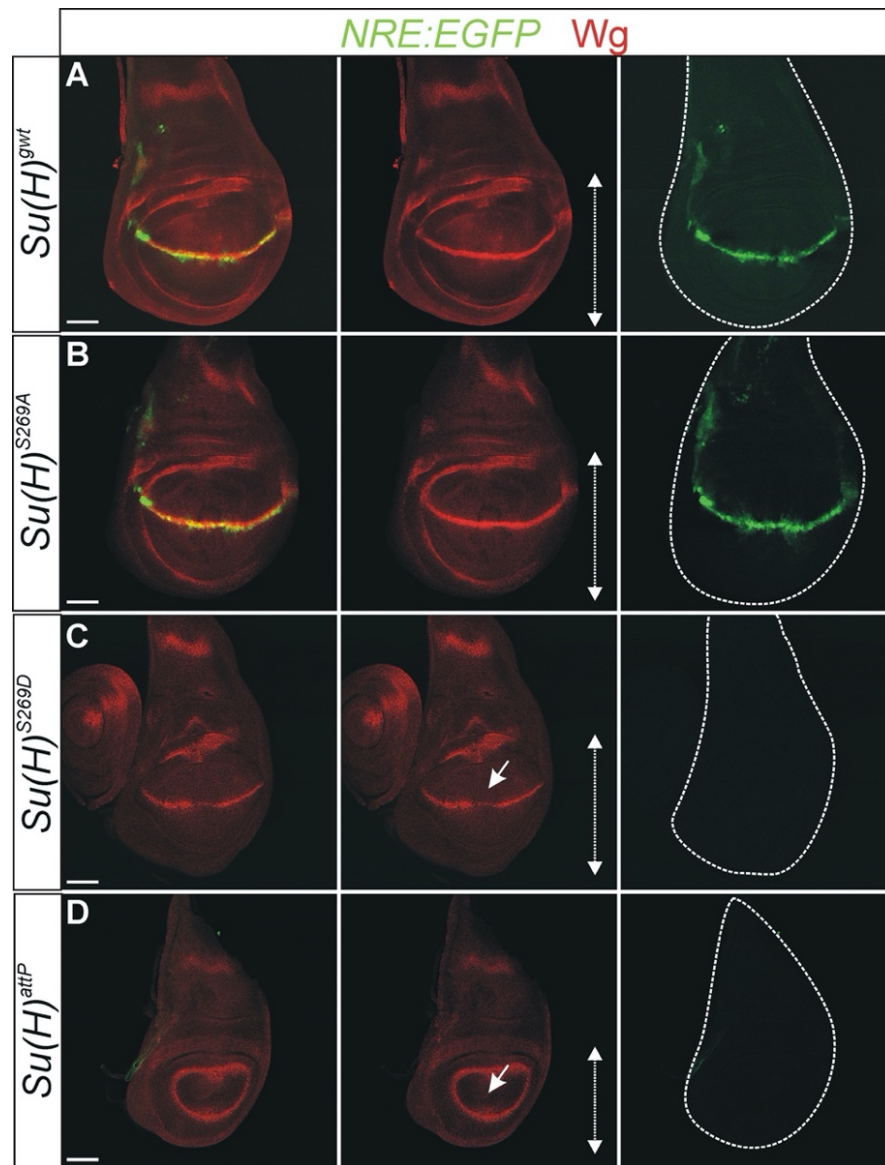

**Supplementary Figure 1.** *NRE:EGFP* and *Wg* expression in *Su(H)* phospho-mutants

(A-D) *NRE:EGFP* reporter (green) and *Wg* (red) expression is shown. Readout is similar comparing *Su(H)*<sup>gwt</sup> (A) and *Su(H)*<sup>S269A</sup> (B). By contrast, *Su(H)*<sup>S269D</sup> (C) and *Su(H)*<sup>attP</sup> (D) mutants are devoid of *NRE:EGFP* expression, whereas *Wg* expression at the d/v boundary is reduced in *Su(H)*<sup>S269D</sup> (C, arrow) and absent in *Su(H)*<sup>attP</sup> (D, arrow). Wing blade size is similar in *Su(H)*<sup>gwt</sup> and *Su(H)*<sup>S269A</sup> (A,B), slightly reduced in *Su(H)*<sup>S269D</sup> (C) and very small in *Su(H)*<sup>attP</sup> (D) (double headed arrows). Scale bar: 100  $\mu$ m in all panels.

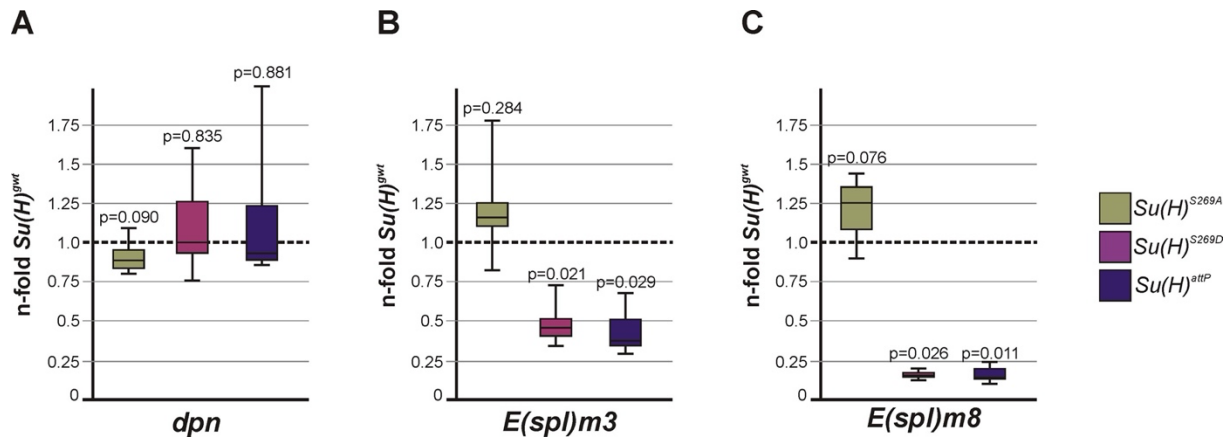

**Supplementary Figure 2.** qRT-PCR analyses of Notch target genes from isolated wing discs. Transcript levels of the Notch target genes *dpn* (A), *E(spl)m3* (B) and *E(spl)m8* (C) were quantified by qRT-PCR from 40 isolated wing discs relative to the control *Su(H)*<sup>wt</sup>. *Tbp* and *cyp33* were taken as reference genes. Data were gained from four biological and two technical replicates. No statistically significant changes were observed between *Su(H)*<sup>S269A</sup> and *Su(H)*<sup>wt</sup>, whereas in *Su(H)*<sup>S269D</sup> and *Su(H)*<sup>attP</sup> mutant discs *E(spl)m3* and *m8* transcripts are reduced. *Dpn* transcripts are unaltered in the mutants, presumably due to the decrease of normal H-mediated repression. Mini-max depicts 95% confidence, median corresponds to expression ratio. The p-values are given above each bar. Significance was tested using PFRR from REST (p<0.05).

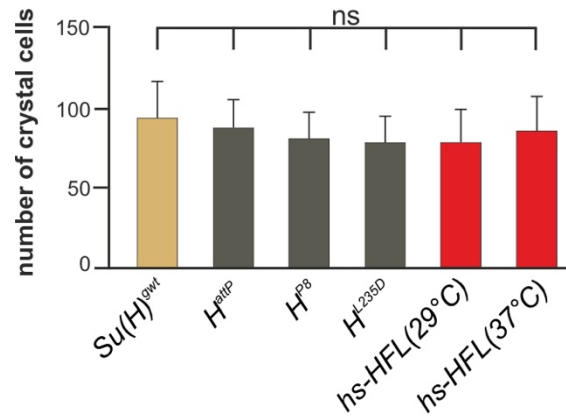

**Supplementary Figure 3.** Neither Hairless gain- nor loss-of-function affects crystal cell formation

Quantification of melanized crystal cells within the last two segments of homozygous third instar larvae of the given genotype. *H<sup>attP</sup>* and *H<sup>P8</sup>* are null mutants; *H<sup>L235D</sup>* is deficient for Su(H) binding. Hs-HFL was induced either constantly at 29°C, or in a 30 min pulse at 37°C 24 h before analysis (n=50, except for *H<sup>P8</sup>* and *H<sup>L235D</sup>* with n=20 each). No significant differences were seen relative to control *Su(H)<sup>wt</sup>* (p>0.5, two-tailed Dunnett's test). Error bars represent  $\pm$  s.d.

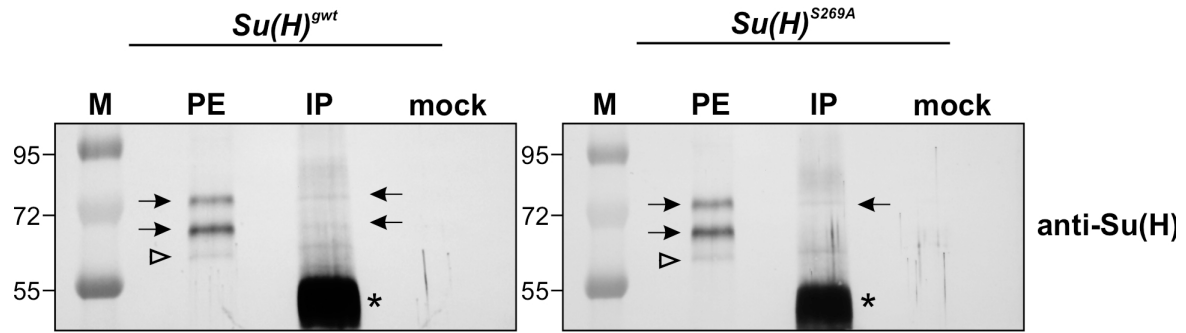

**Supplementary Figure 4.** Su(H) protein is subjected to phosphorylation in the *Drosophila* embryo

Immunoprecipitation on protein extracts from *Su(H)*<sup>gwt</sup> (left panel) and *Su(H)*<sup>S269A</sup> (right panel) embryos, respectively, using phospho-ATM/ATR substrate (S\*Q) mAB. The blots were probed with anti-Su(H) antibodies detecting typically two major bands in protein extracts (PE, arrows; 0.7% of total input); smaller bands presumably derive from degradation (arrowheads). Whereas both Su(H) protein species are present in the phospho-fraction of wild type embryonic extracts, only the upper one is robustly detected in the mutant. (\* heavy chain Ig signal). M, prestained protein ladder; approximate size in kDA.

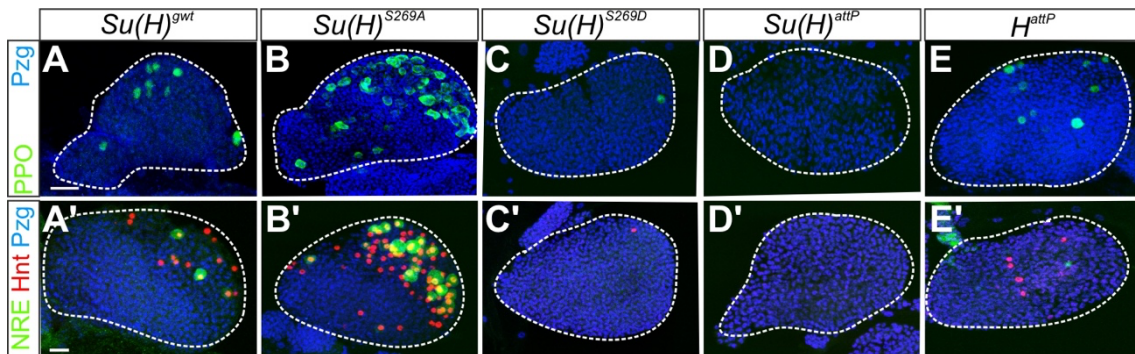

**Supplementary Figure 5.** PPO and *NRE:EGFP* expression in larval lymph glands

(A-E) Primary lobes stained with antibodies against PPO (green) to detect crystal cells and PzG (blue, nuclear marker) to visualize the outlines. (A'-E') *NRE:EGFP* reporter expression (green) was co-detected with anti-Hnt (red) and anti-PzG (blue) in primary lobes. (A,A') *Su(H)*<sup>gwt</sup>, (B,B') *Su(H)*<sup>S269A</sup>, (C,C') *Su(H)*<sup>S269D</sup>, (D,D') *Su(H)*<sup>attP</sup>, (E,E') *H*<sup>attP</sup>. Scale bar: 20  $\mu$ m in all panels.

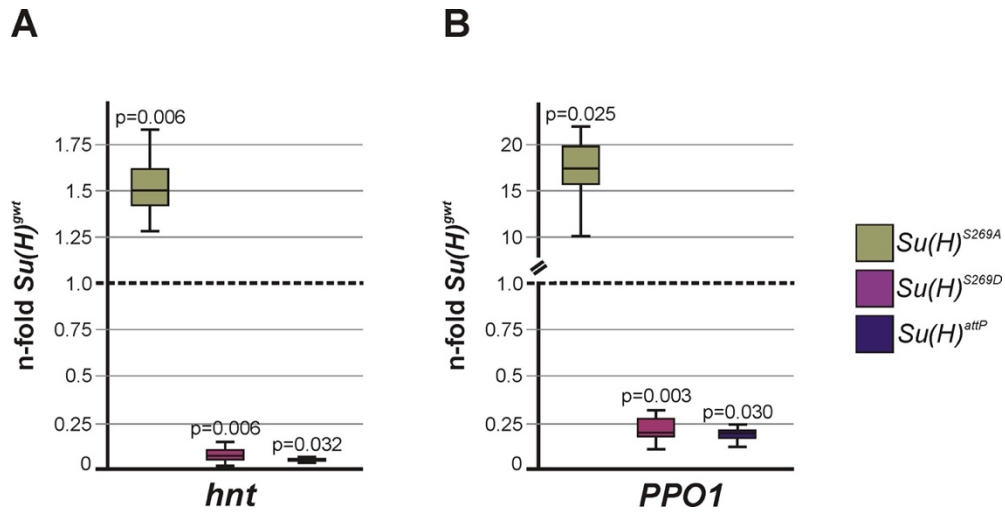

**Supplementary Figure 6.** qRT-PCR analyses on mRNA from larval lymph glands

qRT-PCR analyses on mRNA from 40 isolated lymph glands each. Both, *hnt* (A) and *PPO1* (B) transcription is upregulated in  $Su(H)^{S269A}$  glands and downregulated in  $Su(H)^{S269D}$  and  $Su(H)^{attP}$ . Four biological and two technical replicates were performed. Amplification efficiencies of reference genes *thp*, *cyp33* and *rp49* and tested genes *PPO1* and *hnt* were taken into account for the determination of relative quantities based on REST. Median corresponds to expression ratio; mini-max depicts 95% confidence. All expression ratios shown are significant at the level of  $p < 0.05$  using PFRR from REST; p-values are indicated.

**Supplementary Table 1.** Resources and reagents

| Reagent or Resource                                                     | Source                                          | Identifier                                  |
|-------------------------------------------------------------------------|-------------------------------------------------|---------------------------------------------|
| <b>Antibodies, Serum and Mounting media</b>                             |                                                 |                                             |
| Donkey anti-Mouse Cy3                                                   | Jackson Immuno-Research Laboratories, (Dianova) | Cat# 715-165-151; RRID: AB_2315777 (1:250)  |
| Donkey anti-Rabbit Cy3                                                  | Jackson Immuno-Research Laboratories            | Cat# 711-165-152; RRID: AB_2307443 (1:250)  |
| Donkey anti-Rat Cy3                                                     | Jackson Immuno-Research Laboratories            | Cat# 712-165-153; RRID: AB_2340667 (1:250)  |
| Donkey anti-Mouse FITC                                                  | Jackson Immuno-Research Laboratories            | Cat# 715-095-151; RRID: AB_2335588 (1:250)  |
| Donkey anti-Guinea Pig Cy5                                              | Jackson Immuno-Research Laboratories            | Cat# 706-175-148; RRID: AB_2340462 (1:250)  |
| Goat anti-Horseradish Peroxidase Fluorescein conjugated (anti-HRP-FITC) | Jackson Immuno-Research Laboratories            | Cat# 123-095-021; RRID: AB_2314647 (1:250)  |
| Goat anti-Mouse Alkaline Phosphatase                                    | Jackson Immuno-Research Laboratories            | Cat# 115-055-003; RRID: AB_2338528 (1:1000) |
| Goat anti-Rabbit Alkaline Phosphatase                                   | Jackson Immuno-Research Laboratories            | Cat# 111-055-003; RRID: AB_2337947 (1:1000) |
| Goat anti-Mouse Cy3                                                     | Jackson Immuno-Research Laboratories            | Cat# 115-165-166; RRID: AB_2338692 (1:250)  |
| Goat anti-Rabbit Cy3                                                    | Jackson Immuno-Research Laboratories            | Cat# 111-165-144; RRID: AB_2338006 (1:250)  |
| Goat anti-Rabbit IgG, HRP-linked                                        | Cell Signaling Technology                       | Cat# 7074; RRID: AB_2099233 (1:5000)        |
| Goat anti-Rat Cy3                                                       | Jackson Immuno-Research Laboratories            | Cat# 112-165-167; RRID: AB_2338251 (1:250)  |

|                                   |                                       |                                                |
|-----------------------------------|---------------------------------------|------------------------------------------------|
| Goat anti-Mouse FITC              | Jackson Immuno-Research Laboratories  | Cat# 115-095-166; RRID: AB_2338601 (1:250)     |
| Goat anti-Guinea Pig Alexa 647    | Jackson Immuno-Research Laboratories  | Cat# 106-605-003; RRID: AB_2337446 (1:250)     |
| Guinea Pig anti-Putzig (anti-Pzg) | Own group                             | Kugler and Nagel, 2007; PMID: 17634285 (1:500) |
| Horse anti-mouse IgG, HRP-linked  | Cell Signaling Technology             | Cat# 7076; RRID: AB_330924 (1:5000)            |
| Mouse anti-Cut                    | Developmental Studies Hybridoma Bank  | 2B10; RRID: AB_528186 (1:33)                   |
| Mouse anti-Flag-M5                | Sigma-Aldrich                         | Cat# F4042; RRID: AB_439686 (1:5000)           |
| Mouse anti-GFP (B2)               | Santa Cruz Biotechnology              | Cat# sc-9996; RRID: AB_627695 (1:250)          |
| Mouse anti-Hindsight (anti-Hnt)   | Developmental Studies Hybridoma Bank  | Cat# 1g9; RRID: AB_528278 (1:20)               |
| Mouse anti-PPO                    | Trenczek group, University of Giessen | 12F6; (1:2)                                    |
| Mouse anti-TBP                    | Abcam                                 | Cat# ab818; RRID: AB_306337                    |
| Mouse anti-betaTubulin            | Developmental Studies Hybridoma Bank  | E7; RRID: AB_2315513 (1:3000)                  |
| Mouse anti-Wingless               | Developmental Studies Hybridoma Bank  | 4D4; RRID: AB_528512 (1:33)                    |
| Normal Donkey Serum (NGS)         | Jackson Immuno Research Laboratories  | Cat# 017-000-121; RRID: AB_2337258             |
| Normal Goat Serum (NGS)           | Jackson Immuno Research Laboratories  | Cat# 005-000-121; RRID: AB_2336990             |

|                                                                                   |                                         |                                            |
|-----------------------------------------------------------------------------------|-----------------------------------------|--------------------------------------------|
| Rabbit anti-Su(H)                                                                 | Santa Cruz Biotechnology                | Cat# sc-25761; RRID: AB_672837 (1:500)     |
| Rabbit phospho-ATM/ATR substrate (S*Q) mAB D23H2/D69H5                            | Cell Signaling Technology               | Cat# 9607; RRID: AB_10889739 (1:1000)      |
| Rabbit anti-RBPSuH (D10A4)                                                        | Cell Signaling Technology               | Cat#5313; RRID: AB_2665555 (1:1000)        |
| Rat anti-Deadpan (anti-Dpn)                                                       | Abcam                                   | Cat# ab195173; RRID: AB_2687586 (1:300)    |
| Sheep anti-Digoxigenin-alkaline Phosphatase, Fab fragments                        | Roche Diagnostic                        | Cat# 11093274910; RRID: AB_514497 (1:2000) |
| Sheep anti-mouse IgG, HRP-conjugated                                              | GE-Healthcare                           | Cat# NA931V; RRID: AB_772210 (1:5000)      |
| Vectashield Mounting Medium                                                       | Vector Laboratories                     | Cat# H-1000; RRID: AB_2336789              |
| <b>Experimental Models: Organisms and Strains: <i>Drosophila melanogaster</i></b> |                                         |                                            |
| <i>w<sup>67c23</sup>;; FRT82B H<sup>attP</sup>/TM6B</i>                           | D. Maier group, University of Hohenheim | Praxenthaler et al., 2015; PMID: 26448463  |
| <i>H<sup>P8</sup>/TM6B</i>                                                        | D. Maier group, University of Hohenheim | Maier et al., 1999; PMID: 10559498         |
| <i>H<sup>L235D</sup>/TM6B</i>                                                     | D. Maier group, University of Hohenheim | Praxenthaler et al., 2015; PMID: 26448463  |
| <i>hs H-FL</i>                                                                    | D. Maier group, University of Hohenheim | Maier et al. 1997; PMID: 9347918           |
| <i>N<sup>cos479</sup>/TM6B</i>                                                    | Artavanis-Tsakonas group, Boston, USA   | Ramos et al., 1989; PMID: 2555253          |
| <i>y<sup>l</sup>w<sup>67c</sup>; RBPJ<sup>wt</sup> FRT40A/CyO-GFP</i>             | Own group                               | Gahr et al., 2019; PMID: 31615108          |
| <i>y<sup>l</sup>w<sup>67c</sup>; RBPJ<sup>S221A</sup> FRT40A/ CyO-GFP</i>         | This work                               | N/A                                        |
| <i>y<sup>l</sup>w<sup>67c</sup>; RBPJ<sup>S221D</sup> FRT40A/ CyO-GFP</i>         | This work                               | N/A                                        |



|                                                                   |                                                  |                                                                              |
|-------------------------------------------------------------------|--------------------------------------------------|------------------------------------------------------------------------------|
| $y^l w^{67c}; Su(H)^{attP} FRT40A/CyO-GFP$                        | D. Maier group,<br>University of<br>Hohenheim    | Praxenthaler et<br>al., 2017;<br>PMID:<br>28475577                           |
| $y^l w^{67c}; Su(H)^{gwt} FRT40A$                                 | D. Maier group,<br>University of<br>Hohenheim    | Praxenthaler et<br>al., 2017;<br>PMID:<br>28475577                           |
| $y^l w^{67c}; Su(H)^{S269A} FRT40A$                               | This work                                        | N/A                                                                          |
| $y^l w^{67c}; Su(H)^{S269D} FRT40A/ CyO-GFP$                      | This work                                        | N/A                                                                          |
| $y^l w^* hs-flipase^{1,22}; Ubi-GFP FRT 40A$                      | Bloomington<br>Stock Center                      | RRID:<br>BDSC_5189<br>combined with<br>flipase under<br>heatshock<br>control |
| $y^l w^* hs-flipase^{1,22}; FRT82B Ubi-GFP$                       | Bloomington<br>Stock Center                      | RRID:<br>BDSC_5188<br>combined with<br>flipase under<br>heatshock<br>control |
| Vasa-Integrase:<br>$y^* w^* M\{eGFP.vas-int.Dm\}ZH-2A$            | Basler lab,<br>Zürich                            | Bischof et al.,<br>2007; PMID:<br>17360644                                   |
| <i>OvoD1 FRT40A/Dp(?,2)bw<sup>D</sup>/CyO</i>                     | Bloomington<br>Stock Center                      | BL2121;<br>RRID:<br>BDSC_2121                                                |
| <i>NRE:EGFP</i>                                                   | Merdes group,<br>Basel                           | BL30728;<br>RRID:BDSC_<br>30728                                              |
| <b>Experimental Models: Cell lines</b>                            |                                                  |                                                                              |
| HeLa                                                              | ATCC                                             | CCL2                                                                         |
| Mouse hybridoma mature T cells                                    | Borggreffe<br>group,<br>University of<br>Giessen | E2-10HA1,<br>Giaimo et al.,<br>2017; PMID:<br>28027012                       |
| Phoenix <sup>TM</sup>                                             | Orbigen                                          | N/A                                                                          |
| <b>Recombinant DNA</b>                                            |                                                  |                                                                              |
| cDNA clone PPO1 in pOT2 vector ( <i>in situ</i> probe generation) | Drosophila<br>Genomics<br>Resource Center        | GH04080;<br>cDNA<br>Accession<br>AY060617                                    |
| pcDNA3.1_Flag_mRBPJ_CRr_WT                                        | This work                                        | N/A                                                                          |
| pcDNA3.1_Flag_mRBPJ_CRr_S221A                                     | This work                                        | N/A                                                                          |
| pcDNA3.1_Flag_mRBPJ_CRr_S221D                                     | This work                                        | N/A                                                                          |
| pcDNA3.1_Flag_mRBPJ_CRr-VP16_WT                                   | This work                                        | N/A                                                                          |
| pcDNA3.1_Flag_mRBPJ_CRr-VP16_S221A                                | This work                                        | N/A                                                                          |
| pcDNA3.1_Flag_mRBPJ_CRr-VP16_S221D                                | This work                                        | N/A                                                                          |
| pcDNA3.1_hsNICD                                                   | Mertens lab,<br>University of<br>Ulm             | Close et al.,<br>2019; PMID:<br>30510140                                     |
| pGE-attB <sup>GMR</sup> <i>RBPJ</i> <sup>S221A</sup>              | This work                                        | N/A                                                                          |

|                                                                                                                                      |                                   |                                                |
|--------------------------------------------------------------------------------------------------------------------------------------|-----------------------------------|------------------------------------------------|
| pGE-attB <sup>GMR</sup> <i>RBPJ</i> <sup>S221D</sup>                                                                                 | This work                         | N/A                                            |
| pGE-attB <sup>GMR</sup> <i>Su(H)</i> <sup>S269A</sup>                                                                                | This work                         | N/A                                            |
| pGE-attB <sup>GMR</sup> <i>Su(H)</i> <sup>S269D</sup>                                                                                | This work                         | N/A                                            |
| pMYs_IRES_Flag_Blc                                                                                                                   | This work                         | N/A                                            |
| pMYs_Flag_mRBPJ_CRr_WT_IRES_Blc                                                                                                      | This work                         | N/A                                            |
| pMYs_Flag_mRBPJ_CRr_S221A_IRES_Blc                                                                                                   | This work                         | N/A                                            |
| pMYs_Flag_mRBPJ_CRr_S221D_IRES_Blc                                                                                                   | This work                         | N/A                                            |
| 12xCSL-RE (pGa981/6)                                                                                                                 | Honjo lab,<br>Kyoto<br>University | Minoguchi et<br>al., 1997;<br>PMID:<br>9111338 |
| <b>Critical Commercial Assays and chemicals</b>                                                                                      |                                   |                                                |
| Blasticidin                                                                                                                          | Gibco                             | Cat#<br>A1113903                               |
| Bio-Rad Protein Assay - Dye Reagent Concentrate                                                                                      | Bio-Rad                           | Cat# 500-0006                                  |
| Chloroquine                                                                                                                          | Sigma-Aldrich                     | Cat# C6628-<br>100G                            |
| cOmplete <sup>TM</sup> Ultra Tablets Protease Inhibitor Cocktail                                                                     | Roche                             | Cat#<br>05892791001                            |
| Lipofectamine 2000                                                                                                                   | Thermo Fisher                     | Cat#<br>11668019                               |
| Luciferase Assay System                                                                                                              | Promega                           | Cat# E1501                                     |
| PhosSTOP <sup>TM</sup>                                                                                                               | Roche                             | Cat#<br>04906837001                            |
| Polybrene - transfection reagent                                                                                                     | Sigma-Aldrich                     | Cat # TR-<br>1003 5G                           |
| poly(dI-dC) sodium salt                                                                                                              | Merck                             | Cat# P4929-<br>25UN                            |
| Profectin©Mammalian Transfection System                                                                                              | Promega                           | Cat# E1200                                     |
| Protein A-Agarose                                                                                                                    | Roche                             | Cat#<br>11134515001                            |
| Q5®Site-Directed Mutagenesis Kit                                                                                                     | New England<br>Biolabs            | Cat# E0554                                     |
| QuickChange II XL Site-directed Mutagenesis Kit                                                                                      | Agilent                           | Cat# 200521-5                                  |
| SuperSignal <sup>TM</sup> West Pico PLUS Chemiluminescent Substrate                                                                  | Thermo Fisher<br>Scientific       | Cat# 34580                                     |
| TNT-Assay (T7)                                                                                                                       | Promega                           | Cat# L4610                                     |
| <b>Oligonucleotides for EMSAs and mutagenesis (5'-3')</b>                                                                            |                                   |                                                |
| FO233_F: RBPJ binding sites underlined:<br>CCTGGA <sup>ACTATTT</sup> <u>TTCCAC</u> CGGTGCCCTTCGCCCATT <u>T</u><br><u>TCCACGAGTCG</u> | Biomers                           | N/A                                            |
| FO233_R: RBPJ binding sites underlined:<br>CTCGCGACTC <u>GTGGG</u> <u>AA</u> AATGGGCGGAAGGGCAC<br>CGTGGGAA <sup>AA</sup> ATAGTTC     | Biomers                           | N/A                                            |
| dRBPJ S221A_mut_UP:<br>CAATCGCCTTCGTGCACAGACAGTTAG                                                                                   | Microsynth                        | N/A                                            |
| dRBPJ S221A_mut_LP: AACAGTGCCACCTTCGTTC                                                                                              | Microsynth                        | N/A                                            |
| dRBPJ S221D_mut_UP:<br>GTTAGTACTAGGTACCTGCATGTAGAAG                                                                                  | Microsynth                        | N/A                                            |
| dRBPJ S221D_mut_LP:<br>TGTCTGGTCCCGAAGGCGATTGAACAG                                                                                   | Microsynth                        | N/A                                            |

|                                                                      |                                            |                                     |
|----------------------------------------------------------------------|--------------------------------------------|-------------------------------------|
| mRBPJ S221A_UP: GCACTGTTCAATCGCCTTCGGG<br>CGCAGACAGTTAGTACCAGG       | Microsynth                                 | N/A                                 |
| mRBPJ S221A_LP: CCTGGTACTAACTGTCTGCGCC<br>CGAAGGCGATTGAACAGTGC       | Microsynth                                 | N/A                                 |
| mRBPJ S221D_UP: GCACTGTTCAATCGCCTTCGGG<br>ACCAGACAGTTAGTACCAGG       | Microsynth                                 | N/A                                 |
| mRBPJ S221D_LP: CCTGGTACTAACTGTCTGGTCC<br>CGAAGGCGATTGAACAGTGC       | Microsynth                                 | N/A                                 |
| <b>Software and Algorithms</b>                                       |                                            |                                     |
| Figure assembly                                                      | CorelDRAW®<br>Graphics Suits<br>Version 9  | RRID:SCR_<br>014235                 |
| Data processing and analyzing                                        | Fiji (Image J)                             | RRID:SCR_<br>003070                 |
| Picture processing and analyzing                                     | Corel Photo<br>Paint® Version<br>9.337     | N/A                                 |
| LaserSharp 2000 software for MRC1024                                 | Bio-Rad                                    | N/A                                 |
| Data analysis and graphing                                           | Origin Pro                                 | RRID:SCR_<br>014212                 |
| Statistical evaluation                                               | ANOVA                                      |                                     |
| Statistical significance                                             | Dunnett's test                             | Dunnett, 1955;<br>PMID:<br>14368526 |
| Statistical significance                                             | Tukeys-Kramer                              | Tukey, 1949;<br>PMID:<br>18151955   |
| MIC PCR version 2.10.0                                               | bms/Biozym                                 | Cat# 68MIC-<br>HRM                  |
| <b>Materials, oligonucleotides and equipment for qRT-PCR</b>         |                                            |                                     |
| Absolute QPCR ROX Mix (for qPCR in mature T-cells)                   | Thermo<br>Scientific                       | Cat#<br>AB1138B                     |
| Blue S'Green qPCR Kit (for qPCR in <i>Drosophila</i> tissue)         | Biozym                                     | Cat# 331416                         |
| Dynabeads™ mRNA DIRECT™ Micro Purification Kit                       | Invitrogen,<br>Thermo Fisher<br>Scientific | Cat# 61021                          |
| Dynabeads™ mRNA DIRECT™ Purification Kit                             | Invitrogen,<br>Thermo Fisher<br>Scientific | Cat# 61011                          |
| DNaseI                                                               | New England<br>Biolabs                     | Cat# M0303                          |
| M-MuLV reverse transcriptase                                         | New England<br>Biolabs                     | Cat# M0253S                         |
| qScriber™ cDNA Synthesis Kit                                         | highQu                                     | Cat#<br>RTK0104                     |
| TRIzol                                                               | Ambion                                     | Cat#<br>15596018                    |
| Mic Magnetic Induction Cycler (for qPCR in <i>Drosophila</i> tissue) | bio mol.<br>systems/<br>Biozym             | Cat# 68MIC-2                        |
| StepOne Plus™ - Real Time PCR System (for qPCR in mature T-cells)    | AB / Thermo<br>Fisher Scientific           | Cat# 4376600                        |
| Primers for fly qRT-PCR:                                             |                                            |                                     |

|                                        |            |                                    |
|----------------------------------------|------------|------------------------------------|
| cyp33_UP: CTCTGCGGACGCACAATTC          | Microsynth | PP14577<br>DRSC Fly-<br>PrimerBank |
| cyp33_LP: TGCAACCAGTCGTCATCTGC         | Microsynth | PP14577<br>DRSC Fly-<br>PrimerBank |
| dpn_UP: CCGGCTCGTCATACCAAACCTG         | Microsynth | PP17352<br>DRSC Fly-<br>PrimerBank |
| dpn_LP: CGTCTTGAACCTTCTGGACAACG        | Microsynth | PP17352<br>DRSC Fly-<br>PrimerBank |
| E(spl)m3_UP: CAACAAGTGTCTGGACGATCTC    | Microsynth | PP7204<br>DRSC Fly-<br>PrimerBank  |
| E(spl)m3_LP: ATGTGATCCACGGTCAACTC      | Microsynth | PP7204<br>DRSC Fly-<br>PrimerBank  |
| E(spl)m8_UP: ATGGAATACACCACCAAGACC     | Microsynth | PP10017<br>DRSC Fly-<br>PrimerBank |
| E(spl)m8_LP: GGCGACAAGTGTTTTCAGGTT     | Microsynth | PP10017<br>DRSC Fly-<br>PrimerBank |
| peb/hnt UP: GAGCGGCCATTCCAGTGTGA       | Microsynth | N/A                                |
| peb/hnt LP: TTGTTGTTGGCGCTGGTCGG       | Microsynth | N/A                                |
| proPo_A1_1_UP: TTGGAAGTCCCCGATTCCTTC   | Microsynth | PP22066<br>DRSC Fly-<br>PrimerBank |
| proPo_A1_1_LP: TTCAGATCCACGTCCTTAGAGAA | Microsynth | PP22066<br>DRSC Fly-<br>PrimerBank |
| rp49_UP: AGCATACAGGCCCAAGATCG          | Microsynth | PD41810<br>DRSC Fly-<br>PrimerBank |
| rp49_LP: TGTTGTCGATACCCTTGCGC          | Microsynth | PD41810<br>DRSC Fly-<br>PrimerBank |
| tbp_UP: TAAGCCCCAACTTCTCGATTCC         | Microsynth | PP1556<br>DRSC Fly-<br>PrimerBank  |
| tbp_LP: GCCAAGAGACCTGATCCC             | Microsynth | PP1556<br>DRSC Fly-<br>PrimerBank  |
| Primers for mouse qRT-PCR:             |            |                                    |
| Hes1 UP: TGCCAGCTGATATAATGGAGAA        | Microsynth | N/A                                |
| Hes1 LP: CCATGATAGGCCTTTGATGACTTT      | Microsynth | N/A                                |
| Hprt UP: GGAGCGGTAGCACCTCCT            | Microsynth | N/A                                |
| Hprt LP: AACCTGGTTCATCATCGCTAA         | Microsynth | N/A                                |
| Lgmn UP: GAATTCCACGGTTCTGC             | Microsynth | N/A                                |
| Lgmn LP: AGCACCAGGCTGAGAAGC            | Microsynth | N/A                                |
| Notch1 UP: TGACCTGCTCACTCTCACAGA       | Microsynth | N/A                                |
| Notch1 LP: TCAGCCTGCTGACATGATTT        | Microsynth | N/A                                |
| Tbp UP: GGGGAGCTGTGATGTGAAGT           | Microsynth | N/A                                |
| Tbp LP: CCAGGAAATAATTCTGGCTCAT         | Microsynth | N/A                                |
